# Supplementary material for: Acupuncture Treatment Associated with Functional Connectivity Changes in Primary Dysmenorrhea: A Resting State fMRI Study
Source: MDPI journal article supplement (doi:10.3390/jcm10204731), 2021-10-15
Supplement: s1 [file s1]

## Supplementary Material

## 1 Supplementary Tables

### 1.1 Supplementary Table S1. Represented z-value among significant cluster between verum and sham acupuncture intervention

|                       | Verum (N=15) |            |            | Sham(N=12) |            |            |
|-----------------------|--------------|------------|------------|------------|------------|------------|
|                       | Pre          | During     | Post       | Pre        | During     | Post       |
| <b>Post vs Pre</b>    |              |            |            |            |            |            |
| R Mid Frontal G       | -0.07±0.12   | -0.10±0.11 | -0.09±0.15 | -0.05±0.12 | -0.07±0.11 | -0.14±0.16 |
| <b>During vs Pre</b>  |              |            |            |            |            |            |
| R Inf Parietal Lob    | -0.04±0.10   | -0.05±0.11 | -0.03±0.15 | -0.01±0.10 | -0.04±0.15 | -0.06±0.14 |
| R Mid Occipital G     | -0.06±0.09   | -0.14±0.12 | -0.03±0.11 | -0.04±0.10 | -0.03±0.09 | -0.05±0.14 |
| <b>Post vs During</b> |              |            |            |            |            |            |
| L dACC                | 0.03±0.15    | 0.10±0.15  | 0.04±0.18  | -0.02±0.10 | 0.11±0.13  | -0.02±0.13 |
| L Postcentral G       | -0.01±0.14   | 0.01±0.10  | 0.01±0.18  | 0.05±0.23  | -0.08±0.29 | 0.03±0.12  |

Pre: pre-treatment; During: during-treatment; Post: post-treatment; L: left; R: right; Mid: middle; dACC: dorsal anterior cingulate cortex; G: gyrus; Lob: lobule. All values are presented as mean  $\pm$  SD.

## 1.2 Supplementary Table S2. Changes in functional connectivity map after verum or sham acupuncture intervention

| Verum                   |         |      |       |            |     |     | Sham              |    |      |       |            |     |    |
|-------------------------|---------|------|-------|------------|-----|-----|-------------------|----|------|-------|------------|-----|----|
| Anatomical Area         | BA      | Size | t-max | Coordinate |     |     | Anatomical Area   | BA | Size | t-max | Coordinate |     |    |
|                         |         |      |       | x          | y   | z   |                   |    |      |       | x          | y   | z  |
| <b>Post &gt; Pre</b>    |         |      |       |            |     |     |                   |    |      |       |            |     |    |
| n.s.                    |         |      |       |            |     |     | n.s.              |    |      |       |            |     |    |
| <b>Post &lt; Pre</b>    |         |      |       |            |     |     |                   |    |      |       |            |     |    |
| n.s.                    |         |      |       |            |     |     | n.s.              |    |      |       |            |     |    |
| <b>During &gt; Pre</b>  |         |      |       |            |     |     |                   |    |      |       |            |     |    |
| L Cerebellum            | Pyramis | 441  | 5.11  | -34        | -76 | -50 | R Mid Occipital G | 19 | 981  | 4.85  | 32         | -88 | 16 |
|                         |         |      |       |            |     |     | R Cuneus          | 18 |      | 4.17  | 16         | -94 | 20 |
| <b>During &lt; Pre</b>  |         |      |       |            |     |     |                   |    |      |       |            |     |    |
| Bi ACC                  | 24      | 534  | 4.19  | -2         | 22  | -2  | n.s.              |    |      |       |            |     |    |
|                         |         |      | 3.66  | -2         | 30  | 2   |                   |    |      |       |            |     |    |
| R Inf Frontal G         | 47      |      | 3.35  | 30         | 18  | -14 |                   |    |      |       |            |     |    |
| <b>Post &gt; During</b> |         |      |       |            |     |     |                   |    |      |       |            |     |    |

|                         |       |     |      |     |     |    |                 |    |     |      |    |    |    |  |
|-------------------------|-------|-----|------|-----|-----|----|-----------------|----|-----|------|----|----|----|--|
| R Cuneus                | 19/18 | 503 | 3.55 | 2   | -78 | 32 | n.s.            |    |     |      |    |    |    |  |
| L Precuneus             | 19    |     | 3.24 | -8  | -82 | 44 |                 |    |     |      |    |    |    |  |
| <b>Post &lt; During</b> |       |     |      |     |     |    |                 |    |     |      |    |    |    |  |
| L Postcentral G         | 43    | 595 | 4.21 | -64 | -8  | 20 | R Mid Frontal G | 46 | 429 | 3.71 | 48 | 50 | 6  |  |
| L Sup Temporal G        | 42    |     | 3.87 | -66 | -26 | 14 | R Sup Frontal G | 10 |     | 3.59 | 24 | 46 | 18 |  |
| L Mid Frontal G         | 9     |     | 3.81 | -54 | 18  | 36 |                 |    |     |      |    |    |    |  |

BA: Brodmann area; Size: number of voxels in the cluster; t-max: peak t value; Pre: pre-treatment; During: during-treatment; Post: post-treatment; L: left; R: right; Bil: bilateral; Sup: superior; Mid: middle; Inf: inferior; ACC: anterior cingulate cortex; G: gyrus; Lob: lobule; n.s.: non-significant.
